# Supplementary material for: Occurrence and removal of four artificial sweeteners in wastewater treatment plants of China
Source: Royal Society of Chemistry journal article supplement (doi:10.1039/d2em00351a), 2022-11-04
Supplement: d2em00351a1.pdf [file d2em00351a1.pdf]

**Supplemental Information for**  
**Occurrence and removal of four artificial sweeteners in wastewater**  
**treatment plants of China**

Guochen Shen <sup>a, #</sup>, Shaoting Lei <sup>a, #</sup>, Hongzhou Li <sup>a</sup>, Qingmiao Yu<sup>a, b</sup>, Gang Wu<sup>a</sup>,

Yufei Shi<sup>a</sup>, Ke Xu<sup>a</sup>, Hongqiang Ren<sup>a</sup>, Jinju Geng<sup>a, b, \*</sup>

<sup>a</sup> State Key Laboratory of Pollution Control and Resource Reuse, School of the  
Environment, Nanjing University, Nanjing 210023, Jiangsu, PR China ;

<sup>b</sup> Key Laboratory of the Three Gorges Reservoir Region's Eco-Environment, Ministry  
of Education, Chongqing University, Chongqing 400044, China

#: the authors contribute equally.

\*Corresponding author: Jinju Geng

Email: [jjgeng@nju.edu.cn](mailto:jjgeng@nju.edu.cn).

Tel: +86-25-89680360

## Contents

|                                                                                                                                   |    |
|-----------------------------------------------------------------------------------------------------------------------------------|----|
| <b>Text S1.</b> Sample extraction.....                                                                                            | 3  |
| <b>Table S1</b> Basic information and influent parameters of 12 municipal WWTPs. ....                                             | 4  |
| <b>Table S2</b> Artificial sweeteners concentrations in influents, effluents, and excess sludge of 12 China's WWTPs. ....         | 5  |
| <b>Table S3</b> Major physicochemical characteristics of target Artificial sweeteners.....                                        | 6  |
| <b>Table S4</b> Multi-selected reaction monitoring (MRM) conditions, recoveries, LOD and LOQ of the 4 Artificial sweeteners. .... | 7  |
| <b>Table S5</b> Gradient conditions of mobile phase for HPLC.....                                                                 | 8  |
| <b>Table S6</b> Summary of the aquatic toxicity data and PNEC values for 4 Artificial sweeteners. ....                            | 9  |
| <b>Table S7</b> Per capita mass loads of artificial sweeteners in influents of 12 WWTPs...                                        | 10 |
| References .....                                                                                                                  | 11 |

### **Text S1. Sample extraction**

The volume of sample collection is 2 L for influent, 4 L for effluent, and 1 L for slurry mixture in each WWTP. The Artificial sweeteners were extracted from wastewater samples (500 mL of influent and 1 L of effluent) and sludge samples (0.5 g/dw) according to the method reported in previous study <sup>1</sup>. Briefly, filtered water samples were adjusted to pH 3.0 using 0.1 M hydrochloric acid and were spiked at 100  $\mu$ L of the internal standards (1 mg L<sup>-1</sup>) before extraction. For sludge samples, homogenized and sieved (100-mesh) sludge (0.5 g) was put into 30 mL glass centrifuge tubes. 10 mL of ethyl acetate was added to glass centrifuge tubes, and a Vortex Mixer was used to mix the solution for about 30 s after extraction. The tubes with samples were put into an ultrasonic bath for 15 min, and then centrifuged at 3500 rpm for 10 min. The clear supernatant from each tube was transferred to a 100 mL pear-shaped flask. The extraction procedure was repeated twice using 10 mL and 5 mL of ethyl acetate. Then three extracts (25 mL) were mixed, evaporated at 45 °C using a rotary evaporator, re-dissolved with 1 mL of methanol and filtered through a 0.2  $\mu$ m membrane filter (Agilent Technologies, CA, USA) prior to purification using HLB SPE cartridges. For purification with HLB SPE cartridges, the supernatants were diluted with 200 mL of methanol with a concentration lower than 10%. Then, diluted extract was purified using an Oasis HLB cartridge (200 mg, 6 mL). The preconditioned conditions were the same as the SPE procedure for wastewater samples. The eluents were evaporated to dryness under a gentle N<sub>2</sub> stream. The dried residue was immediately reconstituted with 1 mL of methanol and filtered through a 0.2  $\mu$ m membrane filter (Agilent Technologies, CA, USA) for UPLC-MS/MS detection.

**Table S1** Basic information and influent parameters of 12 municipal WWTPs.

| WWTPs  | Sampling cities | Secondary treatment | Treatment capacity<br>( $\times 10^4$ m <sup>3</sup> /d) | Population equivalent<br>( $\times 10^4$ ) | Population Density<br>( $\times 10^4$ /km <sup>2</sup> ) | COD<br>(mg/L) | TP<br>(mg/L) | TN<br>(mg/L) | NH <sub>4</sub> <sup>+</sup> -N<br>(mg/L) | SS<br>(mg/L) | pH   |
|--------|-----------------|---------------------|----------------------------------------------------------|--------------------------------------------|----------------------------------------------------------|---------------|--------------|--------------|-------------------------------------------|--------------|------|
| WWTP-A | Harbin          | AO                  | 32.5                                                     | 113                                        | 1.71                                                     | 235.2         | 3.77         | 42.5         | 32.15                                     | 230          | 7.9  |
| WWTP-B | Beijing         | AAO                 | 75                                                       | 240                                        | 2.48                                                     | 319           | 6.5          | 48           | 30.7                                      | 310          | 8.4  |
| WWTP-C | Shijiazhuang    | AAO                 | 54.6                                                     | 200                                        | 1.60                                                     | 315           | 4.5          | 60.9         | 52                                        | /            | 7.6  |
| WWTP-D | Qingdao         | AAO                 | 23                                                       | 80                                         | 0.65                                                     | 885           | 25.5         | 106          | 36.5                                      | 127.7        | 7.6  |
| WWTP-E | Lanzhou         | AAO                 | 15.2                                                     | 80                                         | 1.90                                                     | 728           | /            | 62.5         | 47.21                                     | 220          | 7.1  |
| WWTP-F | Xi'an           | AAO                 | 25                                                       | 90                                         | 2                                                        | 480           | 6.1          | 60           | 40                                        | 372          | 7.8  |
| WWTP-G | Hefei           | AAO                 | 21                                                       | 56                                         | 0.57                                                     | 278           | 4            | 38.39        | /                                         | /            | 7.49 |
| WWTP-H | Shanghai        | AAO                 | 30                                                       | 90                                         | 2.41                                                     | 230.2         | 4.28         | 35           | 19                                        | 278          | 7.4  |
| WWTP-I | Ningbo          | AAO                 | 27.5                                                     | 110                                        | 1.24                                                     | 215           | 2.25         | 22.6         | 17                                        | 0.5          | 7.5  |
| WWTP-J | Fuzhou          | AAO                 | 50                                                       | 100                                        | 1.72                                                     | 243           | 2.8          | 28.9         | 21.5                                      | 331.4        | 7.24 |
| WWTP-K | Kunming         | AAO                 | 11.8                                                     | 72.92                                      | 1.62                                                     | 180           | 3.76         | 26.4         | 16.3                                      | 93.5         | 7.12 |
| WWTP-L | Guangzhou       | AAO                 | 120                                                      | 303                                        | 2.46                                                     | 305           | 4.54         | 25.81        | 23.93                                     | 151          | 7.17 |

**Table S2** Artificial sweeteners concentrations in influents, effluents, and excess sludge of 12 China's WWTPs.

| Artificial sweeteners | Influents ( $\mu\text{g/L}$ , n = 12) |      |        |          | Effluents ( $\mu\text{g/L}$ , n = 12) |      |          |          | Excess sludge ( $\text{ng/g}$ , n = 12) |      |        |          |
|-----------------------|---------------------------------------|------|--------|----------|---------------------------------------|------|----------|----------|-----------------------------------------|------|--------|----------|
|                       | min                                   | max  | median | Freq (%) | min                                   | max  | median   | Freq (%) | min                                     | max  | median | Freq (%) |
| SUC                   | 1.76                                  | 8.62 | 3.85   | 100      | 0.98                                  | 3.47 | 2.55     | 100      | <LOD <sup>a</sup>                       | 56.9 | 11.34  | 91.7     |
| ACE                   | 0.25                                  | 2.43 | 1.29   | 100      | 0.07                                  | 3.06 | 0.52     | 100      | <LOD                                    | 8.31 | <LOD   | 41.7     |
| APM                   | 0.02                                  | 1.23 | 0.560  | 100      | 0.03                                  | 0.71 | 0.15     | 100      | <LOD                                    | 51.8 | <LOD   | 41.7     |
| NTM                   | 4.79E-04                              | 0.56 | 0.0300 | 100      | <LOD                                  | 0.04 | 9.34E-03 | 91.7     | <LOD                                    | 0.87 | <LOD   | 25       |

a: Concentration of individual Artificial sweeteners less than respective LOD.

LOD: Method limit of detection

**Table S3** Major physicochemical characteristics of target Artificial sweeteners.

| Compound   | Structure                                                                           | Acronym | CAS No.     | Formula                                                        | $\log K_{ow}^d$ |
|------------|-------------------------------------------------------------------------------------|---------|-------------|----------------------------------------------------------------|-----------------|
| Neotame    | 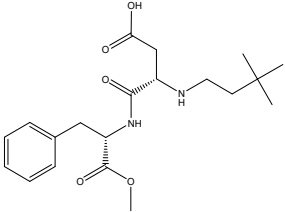   | NTM     | 165450-17-9 | C <sub>20</sub> H <sub>30</sub> N <sub>2</sub> O <sub>5</sub>  | 2.88            |
| Aspartame  |    | ASP     | 22839-47-0  | C <sub>14</sub> H <sub>18</sub> N <sub>2</sub> O <sub>5</sub>  | 0.070           |
| Acesulfame |   | ACE     | 33665-90-6  | C <sub>4</sub> H <sub>4</sub> NO <sub>4</sub> SK               | -2.67           |
| Sucralose  |  | SUC     | 56038-13-2  | C <sub>12</sub> H <sub>19</sub> Cl <sub>3</sub> O <sub>8</sub> | -1.00           |

<sup>d</sup>  $K_{ow}$ : the octanol-water partition coefficient, calculated based on EPI Suite 4.11 from U.S. EPA

**Table S4** Multi-selected reaction monitoring (MRM) conditions, recoveries, LOD and LOQ of the 4 Artificial sweeteners.

| Compound Name | Parent (m/z) | Product ions (m/z) | Cone Voltage (V) | Influents             |                                        |                                        | Effluents             |                           |                           | Sludge                |                             |                             |
|---------------|--------------|--------------------|------------------|-----------------------|----------------------------------------|----------------------------------------|-----------------------|---------------------------|---------------------------|-----------------------|-----------------------------|-----------------------------|
|               |              |                    |                  | Recovery (%) (n=6)    | LOD <sup>b</sup> (ng·L <sup>-1</sup> ) | LOQ <sup>c</sup> (ng·L <sup>-1</sup> ) | Recovery (%) (n=6)    | LOD (ng·L <sup>-1</sup> ) | LOQ (ng·L <sup>-1</sup> ) | Recovery (%) (n=5)    | LOD (ng·g <sup>-1</sup> dw) | LOQ (ng·g <sup>-1</sup> dw) |
| NTM           | 377.2        | 199.9/345          | 40               | 88 ± 2.4 <sup>a</sup> | 4                                      | 2.1                                    | 90 ± 1.2 <sup>a</sup> | 4                         | 3.1                       | 92 ± 2.2 <sup>a</sup> | 0.6                         | 0.18                        |
| ASP           | 293.2        | 200.1/261          | 38               | 87 ± 5.3              | 10                                     | 40                                     | 89 ± 5.1              | 3                         | 10                        | 87 ± 5.3              | 0.1                         | 0.5                         |
| ACE           | 162          | 78/82              | 38               | 95 ± 5.1              | 10                                     | 20                                     | 93 ± 3.7              | 10                        | 20                        | 92 ± 2.5              | 0.3                         | 0.1                         |
| SUC           | 395.01       | 359.08             | 30               | 89 ± 3.8              | 10                                     | 100                                    | 93 ± 3.1              | 10                        | 100                       | 82 ± 3.6              | 0.25                        | 0.75                        |

<sup>a</sup> mean ± standard deviation; <sup>b</sup> LOD: method limit of detection; <sup>c</sup> LOQ: method limit of quantitation

**Table S5** Gradient conditions of mobile phase for HPLC.

| Retention (min) | Flow (mL/min) | %A (0.1% ammonia in water) | %B (Methanol) |
|-----------------|---------------|----------------------------|---------------|
| Initial         | 0.25          | 95.0                       | 5.0           |
| 0.5             | 0.25          | 95.0                       | 5.0           |
| 1.0             | 0.25          | 5.0                        | 95.0          |
| 3.0             | 0.25          | 5.0                        | 95.0          |
| 3.5             | 0.25          | 95.0                       | 5.0           |
| 4.0             | 0.25          | 95.0                       | 5.0           |

**Table S6** Summary of the aquatic toxicity data and PNEC values for 4 Artificial sweeteners.

| Artificial sweeteners | Specie                 | Endpoint | Values ( $\mu\text{g L}^{-1}$ ) | Duration | Effects          | PNEC ( $\mu\text{g L}^{-1}$ ) | Comment                      | References |
|-----------------------|------------------------|----------|---------------------------------|----------|------------------|-------------------------------|------------------------------|------------|
| ACE                   | <i>Cyprinus carpio</i> | NOEC     | 0.05                            | 12-96 h  | oxidative stress | 20                            | NOEC                         | 2          |
|                       | Zebrafish              | NOEC     | 1000                            | 60 days  | Neuro-behavior   |                               | (fish)<br>AF=50 <sup>a</sup> | 3          |
| SUC                   | <i>Cyprinus carpio</i> | LOEC     | 0.05                            | 48-96 h  | oxidative damage | 0.23                          | EC50                         | 4          |
|                       | <i>Cyprinus carpio</i> | LOEC     | 0.05                            | 12-96 h  | DNA damage       |                               | (fish)<br>AF=1000            | 5          |
| ASP                   | Algae                  | EC50     | 236                             | /        | /                | 2280                          |                              | ECOSAR     |
|                       | Fish                   | pLC50    | 2.28*10 <sup>6</sup>            | /        | /                |                               | LC50                         | DSSTox     |



---

|     |      |       |                      |   |   |      |                   |        |
|-----|------|-------|----------------------|---|---|------|-------------------|--------|
| NEO | Fish | pLC50 | 1.63*10 <sup>6</sup> | / | / | 1630 | (fish)<br>AF=1000 | DSSTox |
|-----|------|-------|----------------------|---|---|------|-------------------|--------|

---

<sup>a</sup> AF: artificial sweeteners assessment factor. The artificial sweeteners assessment factor chosen according to the European Technical Guidance Document (European Commission, 2003)

**Table S7** Per capita mass loads of artificial sweeteners in influents of 12 WWTPs

| WWTPs  | SUC (mg/(d·p)) | ACE (mg/(d·p)) | APM (mg/(d·p)) | NTM (mg/(d·p)) |
|--------|----------------|----------------|----------------|----------------|
| WWTP-A | 7.21           | 3.61           | 1.14           | 0.04           |
| WWTP-B | 14.35          | 7.59           | 2.63           | 0.02           |
| WWTP-C | 10.25          | 3.32           | 3.34           | 1.52           |
| WWTP-D | 13.90          | 0.73           | 0.06           | 0.01           |
| WWTP-E | 7.49           | 2.90           | 1.50           | 0.27           |
| WWTP-F | 9.70           | 4.61           | 0.28           | 0.04           |
| WWTP-G | 6.61           | 2.33           | 2.70           | 0.19           |
| WWTP-H | 9.98           | 6.06           | 3.40           | 0.10           |
| WWTP-I | 5.04           | 1.74           | 1.93           | 0.07           |
| WWTP-J | 43.08          | 6.59           | 0.54           | 0.19           |
| WWTP-K | 13.65          | 2.01           | 0.16           | 0.00           |
| WWTP-L | 18.99          | 8.70           | 1.17           | 0.43           |

## References

1. Q. Yu., J. Geng. and H. Ren., Occurrence and fate of androgens in municipal wastewater treatment plants in China, *Chemosphere*, 2019, **237**, 124371.
2. C. Cruz-Rojas., N. SanJuan-Reyes., M. P. A. G. Fuentes-Benites., O. Dublán-García., M. Galar-Martínez., H. Islas-Flores. and L. M. Gómez-Oliván., Acesulfame potassium artificial sweetener: Its ecotoxicity measured through oxidative stress biomarkers in common carp (*Cyprinus carpio*), *Science of the Total Environment*, 2019, **647**, 772-784.
3. G. Dong., X. Li., G. Han., L. Du. and M. Li., Zebrafish neuro-behavioral profiles altered by acesulfame (ACE) within the range of "no observed effect concentrations (NOECs)", *Chemosphere*, 2020, **243**, 125431.
4. K. Saucedo-Vence., A. Elizalde-Velázquez., O. Dublán-García., M. Galar-Martínez., H. Islas-Flores., N. SanJuan-Reyes., S. García-Medina., M. Dolores., Hernández-Navarro. and L. M. Gómez-Oliván., Toxicological hazard induced by sucralose to environmentally relevant concentrations in common carp (*Cyprinus carpio*), *Science of the Total Environment*, 2017, **575**, 347-357.
5. G. Heredia-García., L. M. Gómez-Oliván., J. M. Orozco-Hernández., M. Luján-Mondragón., H. Islas-Flores., N. SanJuan-Reyes., M. Galar-Martínez., S. García-Medina. and O. Dublán-García., Alterations to DNA, apoptosis and oxidative damage induced by sucralose in blood cells of *Cyprinus carpio*, *Science of the Total Environment*, 2019, **692**, 411-421.
